# Supplementary material
Source: PubMed Central journal article supplement (PMC1413790)
Supplement: pnas_0509379103_9.pdf [file pnas_0509379103_9.pdf]

## Supporting Materials and Methods

**Tools for the Generation and Analysis of Folded Protein Structures.** To generate the ensemble of compact homopolypeptide conformations, a protein model, protein force field, and conformational search scheme are required. Then, given an ensemble of structures, we require clustering algorithms to select representatives from a diverse set of conformations. Finally, we need a sensitive algorithm to identify the structural analogs of the computer-generated conformations from a representative set of structures in the PDB and vice versa. In what follows, we describe the tools that address these issues.

**Protein Models, Force Fields, and Conformational Search Protocols.** Since there does not yet exist a perfect force field capable of folding an arbitrary protein to its native structure, it is important to assess the sensitivity of the results to the particular force field and protein representation used. If the results are insensitive to protein representation (i.e., whether or not a continuous space, detailed atomic model, or a  $C^\alpha$  plus  $C^\beta$ , CAS, lattice-based model is used), the particular force field, and the conformational search scheme, then this result is suggestive that the resulting conclusions are robust. If, on the contrary, qualitatively different results emerge depending on the details of how the models are constructed, then one would have to be cautious in interpreting how well the simulations mimic the completeness of protein structural space. In what follows, we present an overview of the two models, their associated force fields, and conformational search protocols.

**Detailed Atomic Model, Force Field, and Conformational Search Scheme.** The first model employs a detailed atomic representation of the protein and accounts for all heavy atoms (1, 2). The backbone atoms are typed as peptide N,  $C^\alpha$ , carbonyl C, and O. We consider a homopolypeptide where each side chain has a  $C^\beta$  atom. Atomic radii were calibrated to achieve realistic Ramachandran plots. Bond lengths, chain connectivity, and excluded volume are always maintained. The potential contains two components: pairwise interactions and hydrogen-bonding (H-bonding). Two-body interactions are

represented by a square well, contact potential that does not require the knowledge of native structure (if any) of the protein to be simulated. Atoms A and B, with hard-sphere radii  $r_A$  and  $r_B$ , separated by a distance  $D$  are in contact if  $0.75(r_A + r_B) < D < 1.8(r_A + r_B)$  and interact with a potential  $E_{AB}$ . In addition to the pair potential, a backbone H-bonding,  $E_{HB}$ , function is used to ensure proper secondary structure formation. The relative strength of H-bonding and pairwise interaction is controlled by  $\alpha$ , which balances polymer elongation and collapse.

As shown in Fig. 5, a H-bond is counted when the four atom pairs associated with donor nitrogen and hydrogen and acceptor carbonyl oxygen and carbonyl carbon are within a square well, eliminating the need for angle calculations and increasing computational efficiency. The indicated distances are as follows: d1 is the distance between the donor nitrogen and acceptor oxygen; d2 is the distance between the donor nitrogen and acceptor carbonyl carbon; d3 is the distance between the donor hydrogen and acceptor oxygen; and d4 is the distance between the donor hydrogen and acceptor carbonyl carbon. In this particular variant, interactions are only allowed between residues  $i$  and residues  $i + 2$ ,  $i + 3$ , and  $i + 4$ . Thus, H-bonds using this potential are essentially limited to helical conformations. The H-bond energy,  $E_{HB}$  (in dimensionless units), for specific distance parameters is given in the accompanying H-bond potential file tabulated in the format d1, d2, d3, d4, and E.

The total energy of a given conformation,  $E_{total}$ , is given by

$$E_{total} = \alpha E_{HB} + (1 - \alpha) E_{AB} \cdot \mathbf{(1)}$$

Based on previous work, we set  $\alpha = 0.9$ . For a test set of seven proteins, in the native state the ratio of  $E_{AB}$  to  $E_{HB}$  is  $\approx 3:1$ , even though the strength of an average atom-atom contact is only 1/10 that of the energy of a H-bond.

The dihedral move set (1, 2) satisfies detailed balance (1, 3), with the amplitudes of moves drawn from a Gaussian distribution with zero mean and  $2^\circ$  variance for the

backbone and  $10^\circ$  variance for the side-chain  $\chi$  angles. Conformations are searched using replica exchange Monte Carlo (4).

**CAS Reduced Protein Model, Force Field, and Conformational Search Scheme.** The conformation of a protein in the CAS model is described by its  $C^\alpha$  atoms and the side-chain centers of mass (SG), taken here to be a  $C^\beta$  (5). The force field used in this study is a subset of the full TASSER force field (a protein structure prediction algorithm) (5) and consists of: (i) Uniform hydrophobic interactions between side-chain residues for the purpose of generating compact conformations; (ii) H-bonding described in further detail below; (iii) excluded volume; and (iv) an energetic bias to a preassigned secondary structure. For helices this is an energetic bias toward loosely defined helical conformations, whereas for  $\beta$ -strands this is a weak bias toward extended conformations. The secondary structures regions are assigned in the following way: Each secondary structure fragment (helix or strands) is followed by a short loop. The sizes of the secondary structures and loops are randomly taken from a distribution derived according to PDB statistics (Fig. 6). For  $\alpha\beta$  proteins, the helices and strands are randomly ordered, each with 50% probability of assignment.

**H-Bond Interactions in the CAS Model.** Since H-bonding is essential to the results, we present the explicit details of the H-bond scheme. The strength and occurrence of H-bonds in the CAS model are defined by the contact order (CO, residue distance along sequence) and relative orientation and geometry of donor and receptor residues. As shown in Fig. 7, if we define  $cc = \bar{c}_i \cdot \bar{c}_j$ ,  $bb = \bar{b}_i \cdot \bar{b}_j$ ,  $pp = \bar{p}_i \cdot \bar{p}_j$ ,  $qq = \bar{q}_i \cdot \bar{q}_j$ ,  $bri = |\varepsilon \bar{b}_i - \bar{r}|$ ,  $brj = |\varepsilon \bar{b}_j - \bar{r}|$ , and  $r = |\bar{r}|$ , the H-bonding energy in the CAS model can be calculated by the following automated procedure:

*For a hydrogen bond between residues that are located in an  $\alpha$ -helix,*

If  $ss \neq \beta$  and  $CO = 3$  and  $bb > bb_\alpha$ , then

If  $cc > cc_\alpha$  and  $r < r_\alpha$  and  $pp > pp_\alpha$  and  $qq > qq_\alpha$ , then

$$E_{\text{HB}} = \lambda_\alpha (1 - |cc - cc_{\alpha 0}|) (1 - |bb - bb_{\alpha 0}|) / [(1 + |bri - br_{\alpha 0}|) (1 + |brj - br_{\alpha 0}|)]$$

*For a hydrogen bond between residues that are located in antiparallel  $\beta$ -strands,*

If  $ss \neq \alpha$  and  $CO > 4$  and  $bb < -bb_\beta$ , then

If  $cc > cc_\beta$  and  $r < r_\beta$  and  $pp < -pp_\beta$  and  $qq < -qq_\beta$ , then

$$E_{\text{HB}} = \lambda_\beta |bb| cc / [(1 + bri/2) (1 + brj/2)].$$

*For a hydrogen bond between residues that are located in parallel  $\beta$ -strands,*

If  $ss \neq \alpha$  and  $CO > 20$  and  $bb > bb_\beta$ , then

If  $cc > cc_\beta$  and  $r < r_\beta$  and  $pp > pp_\beta$  and  $qq > qq_\beta$ , then

$$E_{\text{HB}} = \lambda_\beta bb * cc / [(1 + bri/2) (1 + brj/2)]. \quad (2)$$

Here  $ss \neq \alpha(\beta)$  means neither putative donor nor receptor residues are assigned as an  $\alpha$ -helix ( $\beta$ -strand).  $\lambda_{\alpha(\beta)} = 1$  if both donor and receptor residues are each assigned as an  $\alpha$ -helix ( $\beta$ -strand); otherwise  $\lambda_{\alpha(\beta)} = 0.5$ .  $\epsilon = 5.0 \text{ \AA}$  for  $\alpha$ -helix and  $4.6 \text{ \AA}$  for  $\beta$ -sheet. All other parameters are calculated from the statistics of 100 high-resolution structures in PDB (50 in  $\alpha$ -proteins and 50 in  $\beta$ -proteins according to DSSP assignments), and are summarized in Table 2.

This H-bond scheme is mainly designed for the backbone atoms inside  $\alpha$ -helices and between  $\beta$ -strands. But rarely some backbone atoms in the loop or tail regions also may

form a H-bond with other backbone atoms if their relative geometry satisfies any of the above conditions.

**Starting Conformations, Move Sets, and Sampling.** The protein chain is confined to a high-coordination number lattice (5), and the only input for the 150 chains is the secondary structure assignments. All conformations start from a random, extended coil. Unlike the full TASSER algorithm (5), no fragments are excised from the PDB, nor are idealized secondary structural elements used. Parallel Hyperbolic Monte Carlo sampling (6), an improved variant of Replica Exchange Monte Carlo(4), is used to explore conformational space. Conformational updates consist of two to six bond movements and multibond sequence shifts (5).

**The SPICKER Clustering Algorithm.** To select representative structures from the trajectories of either the atomic or CAS protein models, we employ the structure clustering algorithm, SPICKER (7). SPICKER is a greedy algorithm where members of each cluster are selected as follows: For a given pairwise rmsd cutoff,  $R_{\text{cut}}$ , the first cluster contains the structure with the most neighbors (that comprise the “cluster center structure”), as well as the structures of all its neighbors. The second cluster contains the structure with the second largest number of neighbors, excluding all members of the first cluster, as well as the structures of all its neighbors, etc. As shown elsewhere, SPICKER (7) has been extensively benchmarked (5, 8-10) and found to show improvement over previous clustering algorithms (11) in selecting representative lowest free energy structures.

**TM-ALIGN: A New Structural Alignment Algorithm.** Since our goal is to compare the computer-generated compact structures with protein structures found in the PDB, a tool to generate structural alignments between them is needed. Structural alignments assess the structural similarity between a pair of structures, where the set of equivalent residues required for the comparison is not *a priori* given. Therefore, an optimal alignment needs to be identified; this is in principle NP-hard (12). Various different heuristic approaches have been proposed to search for this “best” structure alignment

given a metric of structural similarity. These differ mainly in the metric used to assess the alignments and the search algorithm that identifies the putative best alignment.

Representative approaches include DALI (13), CE (14), STRUCTAL (15), and SAL (16). For example, STRUCTAL (15) and SAL (16) use the interstructural residue-residue distance based Levitt-Gerstein,  $LG$ , score matrix and maximize the cumulative  $LG$ -score (15) or relative rms distance (rmsd) (17), by a heuristic iterative Needleman-Wunsch dynamic programming approach (18). During the iterations, both algorithms use a rotation matrix that is constructed to minimize the rmsd between a pair of structures. However, the average rmsd of randomly related proteins depends on the length of compared structures, which renders its absolute magnitude meaningless (17).

The recently proposed TM-score (19) overcame this issue, where the TM-score is defined as

$$\text{TM-score} = \text{Max} \left[ \frac{1}{L_{\text{Target}}} \sum_i^{L_{\text{ali}}} \frac{1}{1 + \left( \frac{d_i}{d_0(L_{\text{Target}})} \right)^2} \right]. \quad (3)$$

Here,  $L_{\text{Target}}$  is the length of target protein that the other structure is aligned to;  $L_{\text{ali}}$  is the number of aligned residues;  $d_i$  is the distance between the  $i$ th pair of aligned residues.

$d_0(L_{\text{Target}}) = 1.24 \sqrt[3]{L_{\text{Target}} - 15} - 1.8$  is a distance parameter that normalizes the distance so that the average TM-score is independent of protein size for a random structure pair. The TM-score {whose range is (0,1]} has an average value of 0.17 for a pair of randomly related structures (19) and a value of 1.0 for two identical protein structures.

Our recently developed structural alignment algorithm TM-ALIGN (20) exploits these insights and extends the approaches of STRUCTAL (15) and SAL (16), by using the TM-score rotation matrix to speed up the identification of the best structure alignments. When the best structural alignments between a pair of randomly related structures are

considered, the average TM-score is 0.30, and the standard deviation (SD) is 0.01. We examine this issue further in Fig. 8, where we show the histogram of the TM-score of the best structural alignment of 158 distinct, compact conformations of 200 residue freely jointed chains, FJC, to the representative PDB template library of 6,967 proteins that cover the PDB at a 50% sequence identity cutoff. Interestingly, the average TM-score of 0.30 is independent of the particular set of unrelated structures that are compared. It is the same average value for structural alignments of FJC to PDB structures or for structural alignments of unrelated single domain proteins in the PDB. Of course, we have to remove the set of related protein structures in the PDB to calculate the SD for randomly related structure pairs; this is why the FJC are used to obtain this value.

The TM-ALIGN algorithm is  $\approx 4$  times faster than CE (14) and 20 times faster than DALI (13) and SAL. On average, the resulting structure alignments have higher accuracy and coverage than those provided by these most often-used methods. Here, this approach is used to identify the optimal structural alignments between the computer-generated conformations and PDB structures. Besides the rmsd and the alignment coverage, TM-ALIGN also reports the TM-score. The TM-ALIGN program is available from the authors upon request.

**TASSER Modeling Starting from Compact Homopolypeptide Templates.** We selected the 10 proteins in the PDB150 set that have the worst structural matches to our 15,000-member library of compact, homopolypeptide models, based on their TM-score, which is available from the authors upon request (see Table 1). We then used TASSER to build full-length models for these 10 proteins starting from the TM-ALIGN structural alignments, where the spatial contact and distance restraints are taken from the selected compact, homopolypeptide templates to guide the TASSER simulation. The results are summarized in Table 1. Although the TM-score of the structural alignments is modest ( $\approx 0.37$ ), the alignments provide the correct topology for  $\approx 2/3$  of the core-region residues. Among the reasons for the modest TM-score is the presence of long tails in a number of the templates. One of the tasks of TASSER is to connect the continuous fragments by building appropriate loops. The average global rmsd from the corresponding PDB structure of the

first TASSER model is 5.11 Å. Most targets have a rmsd <6.5 Å, except for 1fjgl that has a long, unfolded tail in the N terminus (see Fig. 9). If we cut the tail (from PRO1 to SER18), then the global rmsd is 5.8 Å.

TASSER also considerably improves the topology of the structurally aligned regions. The average rmsd to native of the compact homopolypeptide templates and the refined TASSER models is 4.79 and 4.15 Å, respectively, from the PDB structure for the same aligned residues (see Table 1). Fig. 10 shows a representative example, 1at0\_, which demonstrates a significant improvement due to TASSER's ability to readjust the protein's core. There is only one target, 1nkws, where the rmsd of the TASSER model is higher than that of the TM-ALIGN structural alignments. In this example (see Fig. 11), TASSER places the N-terminal in the wrong direction, a known problem of TASSER in modeling the orientation of long tails as well as mutual orientation of protein domains.

**Three-Dimensional (3D) Active-Site Template Library.** For the detection of substructures whose geometry resembles enzyme active sites, we use an updated version of our library of Automated Functional Templates (AFTs) (21). The AFTs are based on the 3D arrangement of residues important for defining the molecular function of a given enzyme. The procedure for building an AFT consists of three steps: (i) Retrieval of functionally important substructures from all PDB structures associated with a specific EC number; (ii) generation of tentative distance-based templates describing the active site; and (iii) a specificity assessment of the AFTs. Previously, we defined an AFT as the spatial arrangement of  $k$  functional building blocks ( $3 \leq k \leq 5$ ), each composed of the  $C^\alpha$  atom of a functional residue, the two adjacent  $C^\alpha$  atoms, and (for non-glycine residues) one pseudoatom corresponding to the side-chain center of mass (SG). To better suit the present analysis, since we focus on sticky homopolypeptides (whose only side chain heavy atom is a  $C^\beta$ ), we use the  $C^\beta$  rather than the SG pseudoatom. Also, to speed up the calculations, we set  $k = 3$ . We now base the AFTs on functionally important substructures where all involved residues are annotated with the ACT\_SITE key name in the Swiss-Prot (22) database (indicating a direct contribution to the enzyme's activity). Finally, we use a stricter definition for the restrictive cutoff to establish the significance of a match:



the maximum distance rmsd (drmsd) (the average rmsd between corresponding distances in the compared substructures), observed between a true positive hit and the corresponding AFT. The permissive cutoff is defined so that the expected number of false positive matches is  $<0.005$  per true negative structure. Following this procedure, a library of 150 AFTs associated with 118 different EC numbers is obtained.

### **Scanning of Native Structures and Sticky Homopolypeptides with the AFT Library.**

We used our AFT library to scan, in a sequence-independent manner, three sets of structures: (i) The top five clustered structures generated by the simulation for each of the one hundred fifty 200-residue homopolypeptides (750 structures); (ii) the same number of native structures from the PDB; and (iii) the representative set of 3,500 compact homopolypeptide structures used to assess the completeness of the compact fold library with respect to the PDB. The 750 native structures are nonredundant (at the level of 40% sequence identity), with lengths ranging from 163 to 230 residues and an average length of 199.7 residues. To eliminate direct effects due to evolution, before scanning the set of native structures with a given AFT, we remove those that correspond to enzymes whose EC numbers share the first two components of the EC number of the AFT under analysis.

By way of illustration, we show in Fig. 11 the relative frequency distributions of substructures of the top 10 AFTs that have the best match to one of the 750 sticky homopolypeptide structures. Given that the sticky homopolypeptide structures are generated at random with no knowledge of the AFT geometry, the results suggest active site geometries at the level of  $C^\alpha$  and  $C^\beta$  atoms arise from the packing of compact secondary structural elements and at the level of substructure geometry are not special. We find that there is no relationship with the set of enzymes functions that have the best match and ancient enzymes.

**Structural Alignment Library.** In the library of aligned structures, there are 913 representative PDB structures and three sets of computer-generated models for the compact sticky, homopolypeptide models: (i) 100-residue chains by atomic off-lattice

modeling; (ii) 100-residue chains by reduced on-lattice modeling; and (iii) 200-residue chains by reduced on-lattice modeling. The files are in the following directories:

- **100\_255**: 255 models of 100 residue proteins (all are  $\alpha$ -proteins) from the atomic, off lattice model.
  
- **100\_150  $\times$  14**: 100 residues, 150 chains each with 14 clusters (i.e., Cluster-1, 2, 3, 4, 5, 10, 25, 50, 75, 100, 125, 150, 175, 200) from the reduced, on-lattice model. For the file name, “a” stands for  $\alpha$ -proteins; “b” for  $\beta$ -proteins; “ab” for  $\alpha\beta$ -proteins.
  
- **200\_150  $\times$  14**: 200 residues, 150 chains each with 14 clusters (i.e., Cluster-1, 2, 3, 4, 5, 10, 25, 50, 75, 100, 125, 150, 175, 200).
  
- **200\_15000**: 200 residues, 150 chains each with the top-100 clusters.
  
- **200\_7000**: 200 residues, 7000 models from clustering of the 200\_15000 set.
  
- **200\_3500**: 200 residues, 3500 models from clustering of the 200\_7000 set.
  
- **150\_PDB**: 913 compact PDB structures whose length is between 41 and 150 residues with a pairwise sequence identity <30%.
  - o **X.PDB**: PDB structures (“X” stands for PDB IDs).
  
  - o **X.ali\_15000**: TM-ALIGN structure alignment of X to the closest model from the 200\_15000 set.
  
  - o **X.ali\_7000**: TM-ALIGN structure alignment of X to the closest model from the 200\_7000 set.

o **X.ali\_3500**: TM-ALIGN structure alignment of X to the closest model from the 200\_3500 set.

o **Summary15000**: Summary of TM-ALIGN results of the PDB150 set to the 200\_15000 set.

o **Summary7000**: Summary of TM-ALIGN results of the PDB150 set to the 200\_7000 set.

o **Summary3500**: Summary of TM-ALIGN results of the PDB150 set to the 200\_3500 set.

o **10worst**: Structural alignments of the 10 worst PDB150 proteins to the closest homopolypeptide model in the 15,000 compact, homopolypeptide library.

1. Shimada, J., Kussell, E. L. & Shakhnovich, E. I. (2001) *J. Mol. Biol.* **308**, 79-95.
2. Hubner, I. A., Edmonds, K. A. & Shakhnovich, E. I. (2005) *J. Mol. Biol.* **349**, 424-434.
3. Shimada, J. & Shakhnovich, E. I. (2002) *Proc. Natl. Acad. Sci. USA* **99**, 11175-11180.
4. Swendsen, R. H. & Wang, J. S. (1986) *Phys. Rev. Lett.* **57**, 2607-2609.
5. Zhang, Y. & Skolnick, J. (2004) *Proc. Natl. Acad. Sci. USA* **101**, 7594-7599.
6. Zhang, Y., Kihara, D. & Skolnick, J. (2002) *Proteins* **48**, 192-201.
7. Zhang, Y. & Skolnick, J. (2004) *J. Comput. Chem.* **25**, 865-871.
8. Skolnick, J., Kihara, D. & Zhang, Y. (2004) *Proteins* **56**, 502-518.
9. Zhang, Y. & Skolnick, J. (2005) *Proc. Natl. Acad. Sci. USA* **102**, 1029-1034.

10. Zhang, Y., Arakaki, A. K. & Skolnick, J. (2005) *Proteins*, **61**, Suppl. 7, 91-98.
11. Betancourt, M. R. & Skolnick, J. (2001) *J. Comp. Chem.* **22**, 339-353.
12. Lathrop, R. H. (1994) *Protein Eng.* **7**, 1059-1068.
13. Holm, L. & Sander, C. (1993) *J. Mol. Biol.* **233**, 123-138.
14. Shindyalov, I. N. & Bourne, P. E. (1998) *Protein Eng.* **11**, 739-747.
15. Levitt, M. & Gerstein, M. (1998) *Proc. Natl. Acad. Sci. USA* **95**, 5913-5920.
16. Kihara, D. & Skolnick, J. (2003) *J. Mol. Biol.* **334**, 793-802.
17. Betancourt, M. R. & Skolnick, J. (2001) *Biopolymers* **59**, 305-309.
18. Needleman, S. B. & Wunsch, C. D. (1970) *J. Mol. Biol.* **48**, 443-453.
19. Zhang, Y. & Skolnick, J. (2004) *Proteins* **57**, 702-710.
20. Zhang, Y. & Skolnick, J. (2005) *Nucleic Acids Res.* **33**, 2302-2309.
21. Arakaki, A. K., Zhang, Y. & Skolnick, J. (2004) *Bioinformatics* **20**, 1087-1096.
22. Boeckmann, B., Bairoch, A., Apweiler, R., Blatter, M. C., Estreicher, A., Gasteiger, E., Martin, M. J., Michoud, K., O'Donovan, C., Phan, I., *et al.* (2003) *Nucleic Acids Res.* **31**, 365-70.
