# Supplementary material
Source: PubMed Central journal article supplement (PMC1413790)

Donor

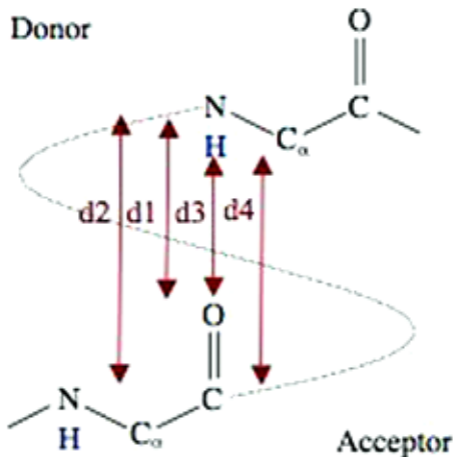

Supplement: pnas_0509379103_1.pdf [file pnas_0509379103_1.pdf]

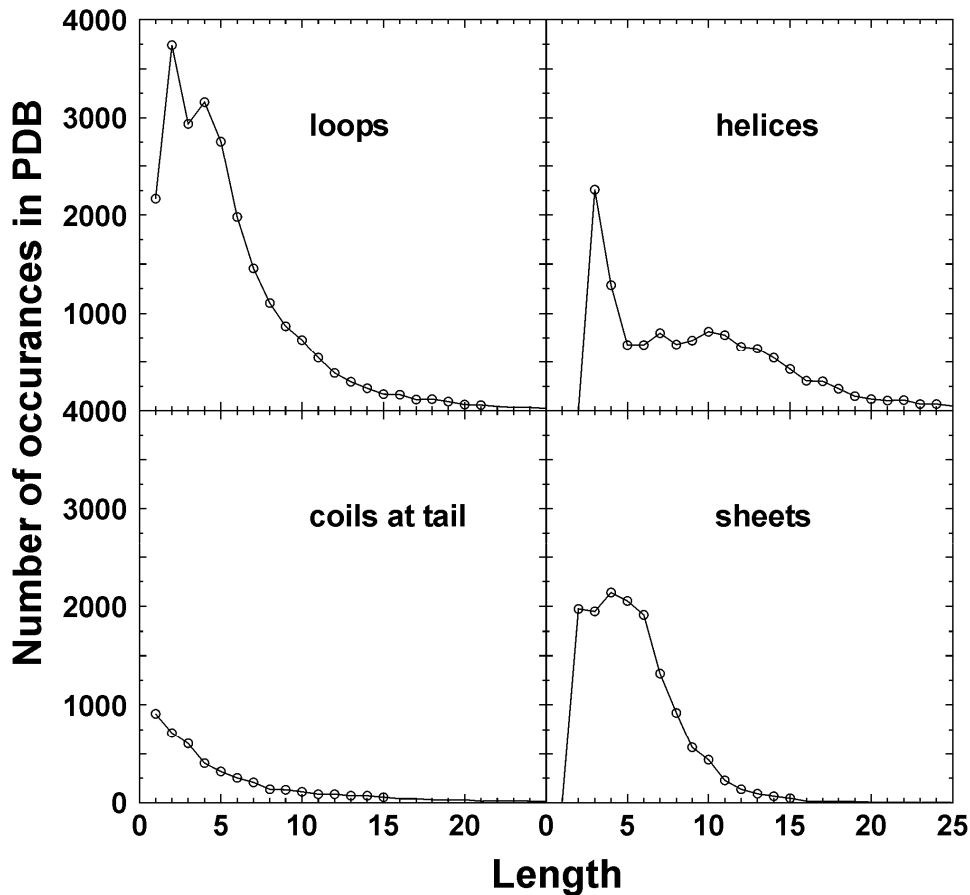

Supplement: pnas_0509379103_2.pdf [file pnas_0509379103_2.pdf]

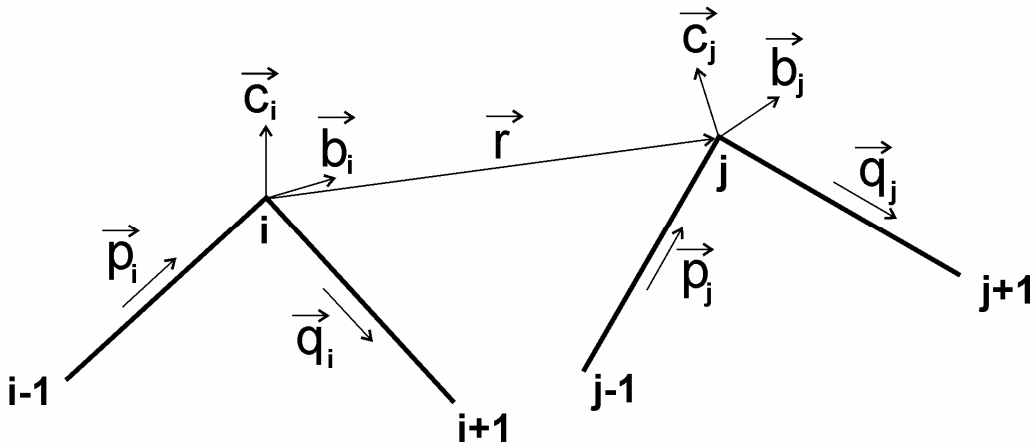

Supplement: pnas_0509379103_3.pdf [file pnas_0509379103_3.pdf]

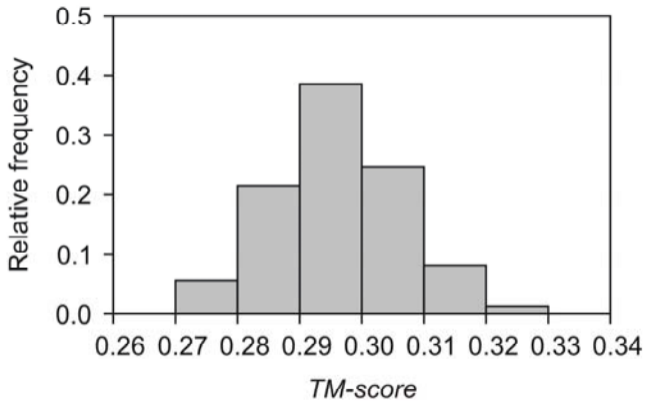

Supplement: pnas_0509379103_4.pdf [file pnas_0509379103_4.pdf]

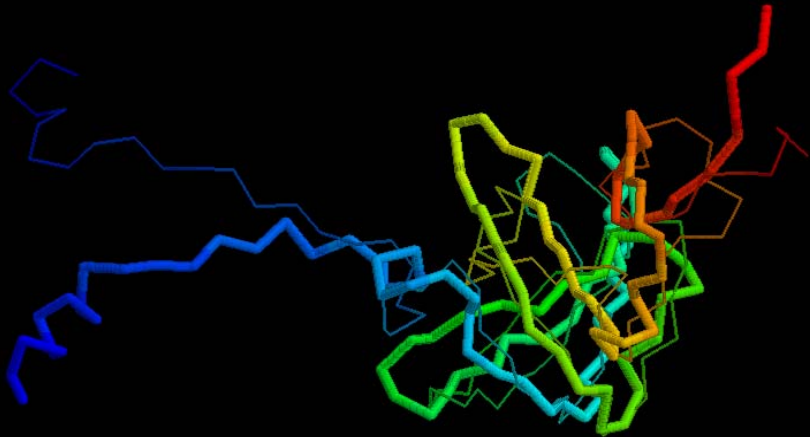

Supplement: pnas_0509379103_5.pdf [file pnas_0509379103_5.pdf]

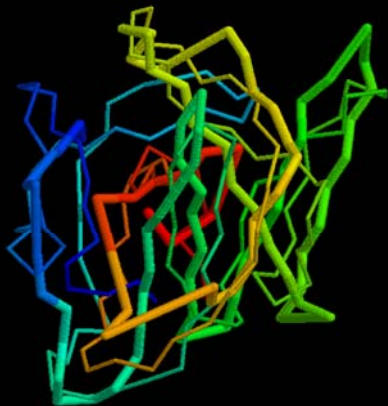

**Template/Native**  
4.46 Å

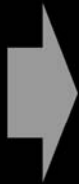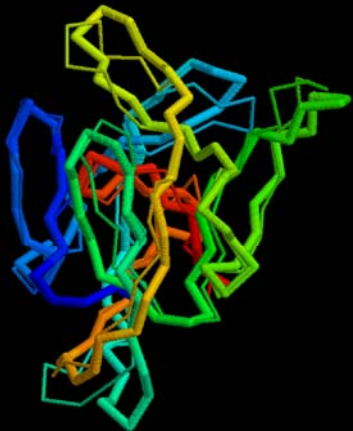

**Model/Native**  
2.13 Å

Supplement: pnas_0509379103_6.pdf [file pnas_0509379103_6.pdf]

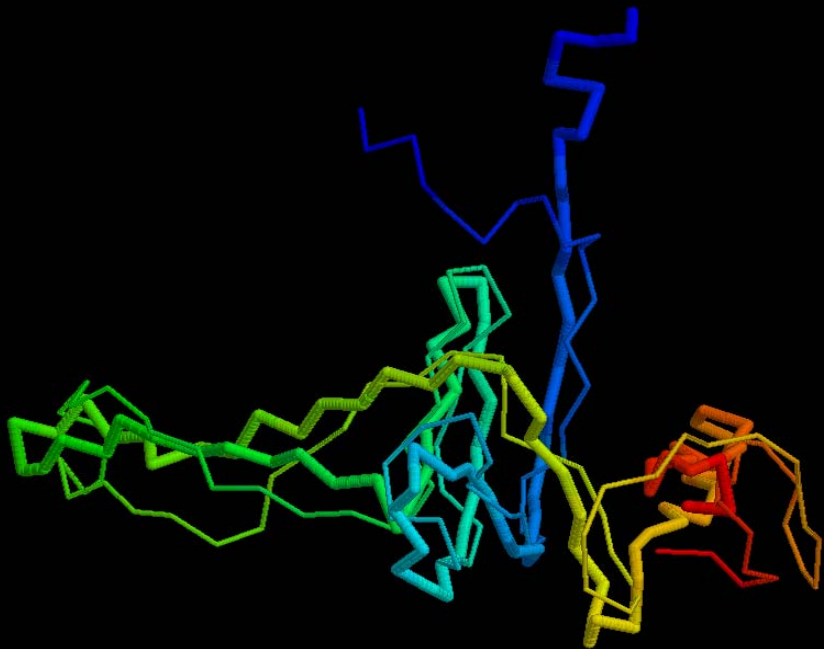

Supplement: pnas_0509379103_7.pdf [file pnas_0509379103_7.pdf]

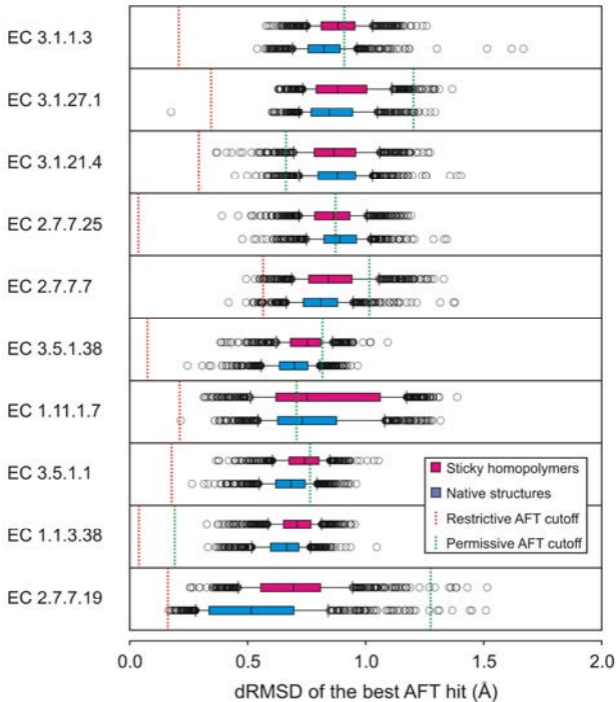

Supplement: pnas_0509379103_8.pdf [file pnas_0509379103_8.pdf]
